# Supplementary material
Source: PubMed Central journal article supplement (PMC5520031)
Supplement: ismej201743x2.pdf [file ismej201743x2.pdf]

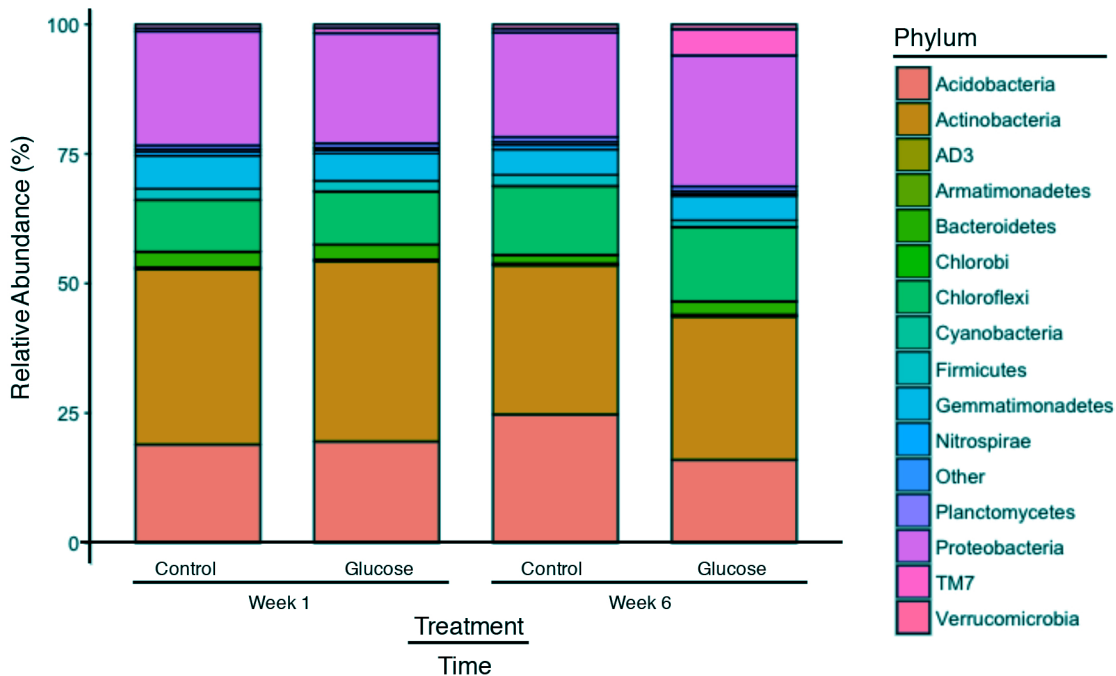

**Supplementary Figure S2)** Average relative abundance (% of 16S rRNA gene sequences) of dominant phyla (>1% of total sequences) in the control and glucose amended soils during weeks one and six.
